# Supplementary material for: Phenolic Compounds and Triterpenes in Different Olive Tissues and Olive Oil By-Products, and Cytotoxicity on Human Colorectal Cancer Cells: The Case of Frantoio, Moraiolo and Leccino Cultivars (Olea europaea L.)
Source: MDPI journal article supplement (doi:10.3390/foods10112823), 2021-11-16

## Supporting information file of the manuscript:

Article

# Phenolic compounds and Triterpenes in Different Olive Tissues and Olive Oil By-Products, and Cytotoxicity on Human Colorectal Cancer Cells: the Case of Frantoio, Moraiolo and Leccino Cultivars (*Olea europaea* L.)

Pujun Xie <sup>1,2,3,4,5</sup>, Lorenzo Cecchi <sup>6</sup>, Maria Bellumori <sup>6</sup>, Diletta Balli <sup>6</sup>, Lisa Giovannelli <sup>7</sup>, Lixin Huang <sup>1,2,3,4,5</sup> and Nadia Mulinacci <sup>6,\*</sup>

<sup>1</sup> Institute of Chemical Industry of Forest Products, CAF. Nanjing 210042, China.

<sup>2</sup> National Engineering Laboratory for Biomass Chemical Utilization. Nanjing 210042, China.

<sup>3</sup> Key and Open Laboratory on Forest Chemical Engineering, SFA. Nanjing 210042, China.

<sup>4</sup> Key Laboratory of Biomass Energy and Material, Nanjing 210042, China; pujunxie@caf.ac.cn (P.X.); l\_x\_huang@163.com (L.H.)

<sup>5</sup> Co-Innovation Center of Efficient Processing and Utilization of Forest Resources, Nanjing Forestry University, Nanjing 210037, China

<sup>6</sup> University of Florence, Department of NEUROFARBA, Nutraceutical and Pharmaceutical Section, Via Ugo Schiff 6, Sesto Fiorentino, 50019 Florence, Italy; lo.cecchi@unifi.it (L.C.); maria.bellumori@unifi.it (M.B.); diletta.balli@unifi.it (D.B.)

<sup>7</sup> University of Florence, Department of NEUROFARBA, Pharmacology and Toxicology Section, Viale Pieraccini 6, 50139 Florence, Italy; lisa.giovannelli@unifi.it

\* Correspondence: nadia.mulinacci@unifi.it; Tel.: +39-0554573773

**Table S1.** Dryness yield of the different extracts from the three Tuscan varieties.

| Samples as raw materials (g) | <i>Frantoio</i> |       | <i>Leccino</i> |       | <i>Moraiolo</i> |       |
|------------------------------|-----------------|-------|----------------|-------|-----------------|-------|
|                              | g dryness/g     | SD    | g dryness/g    | SD    | g dryness/g     | SD    |
|                              | sample          |       | sample         |       | sample          |       |
| Olive leaf                   | 0.266           | 0.001 | 0.243          | 0.019 | 0.242           | 0.052 |
| Olive branch                 | 0.243           | 0.019 | 0.177          | 0.038 | 0.100           | 0.033 |
| Olive pomace                 | 0.343           | 0.019 | 0.398          | 0.002 | 0.439           | 0.019 |
| Olive seed                   | 0.244           | 0.012 | 0.211          | 0.050 | 0.232           | 0.004 |
| Olive shell                  | 0.042           | 0.007 | 0.027          | 0.005 | 0.024           | 0.007 |
| Olive fruit                  | 0.352           | 0.084 | 0.472          | 0.094 | 0.438           | 0.042 |
| Olive oil (EVOO)             | 0.033           | 0.003 | 0.033          | 0.002 | 0.032           | 0.001 |

Note: water containing in the raw material is not included.

**Table S2.** MS fragmentation of individual phenolic compounds of the tested extracts

| Compounds                                     | $\lambda_{\text{max}}$ (nm) | mw   | Major ESI peaks                    |
|-----------------------------------------------|-----------------------------|------|------------------------------------|
| 1-acetoxypinoresinol glucoside                | 280                         | 578  | 577, 415                           |
| bis(oleoside 11-methyl ester) glucoside       | 235                         | 952  | 951, 789, 403                      |
| caffeic acid                                  | 296, 325                    | 180  | 179                                |
| cafselogoside                                 | 295, 328                    | 552  | 551, 507, 389, 162                 |
| comselogoside                                 | 315                         | 536  | 535, 491, 389, 345, 145            |
| demethyleuropein                              | 280                         | 526  | 525, 241                           |
| eriodictyol isomer                            | 290                         | 288  | 575, 287                           |
| eriodictyol-7-O-glucoside isomer              | 285, 336                    | 450  | 449, 287                           |
| esculetin                                     | 268, 295, 343               | 178  | 177, 355                           |
| hydroxytyrosol                                | 280                         | 154  | 153                                |
| hydroxytyrosol glucoside                      | 278                         | 316  | 315, 153                           |
| hydroxytyrosol acetate                        | -                           | 196  | 195                                |
| lariciresinol-sesquilignan                    | -                           | 556  | 555                                |
| ligstroside                                   | 275                         | 524  | 523                                |
| ligstroside oleoside                          | 240                         | 910  | 909, 523, 361                      |
| luteolin                                      | 348                         | 286  | 285                                |
| luteolin derivative                           | 266, 338                    | 448  | 895, 447                           |
| luteolin-3,7-diglucoside                      | 268, 336                    | 610  | 609, 447, 285                      |
| luteolin-4-O'-glucoside                       | 268, 336                    | 448  | 895, 447                           |
| luteolin-7-O-glucoside                        | 253, 344                    | 448  | 895, 447, 285                      |
| nüzhenide                                     | 225, 280                    | 686  | 685, 523, 223                      |
| nüzhenide 11-methyl oleoside                  | 240                         | 1072 | 1071, 909, 685, 523                |
| nüzhenide 11-methyl oleoside isomers 1-3      | 240                         | 1072 | 1071, 909, 685, 523, 299           |
| nüzhenide derivative                          | 230, 280                    | 848  | 847, 685                           |
| nüzhenide di-(11-methyl oleoside) isomers 1-2 | 240                         | 1458 | 1457                               |
| nüzhenide isomer                              | 225, 280                    | 686  | 685, 523, 453                      |
| oleoside 11-methyl ester                      | 240                         | 404  | 807, 403, 223, 179                 |
| oleoside 11-methyl ester isomer               | 240                         | 404  | 807, 403, 223, 179                 |
| oleoside derivative                           | 240                         | -    | 1149, 969, 951, 789, 565, 403, 223 |
| oleuropein                                    | 280                         | 540  | 539, 377, 307, 223                 |
| oleuropein aglycone                           | 280                         | 378  | 377, 307, 275                      |
| oleuropein diglucoside                        | 280                         | 702  | 701, 539                           |
| pinoresinol                                   | 280                         | 358  | 357                                |
| rutin                                         | 254, 352                    | 610  | 609, 301, 300                      |
| Salidroside                                   | 275                         | 300  | 599, 299, 137                      |
| salidroside oleoside                          | 235, 280                    | 686  | 685, 523, 299                      |
| taxifolin glucoside isomer                    | 285, 330                    | 466  | 465, 303                           |
| taxifolin isomer                              | 288, 330                    | 304  | 303                                |
| tyrosol                                       | 276                         | 138  | 137                                |
| verbascoside                                  | 285, 330                    | 624  | 623, 461, 161                      |
| $\beta$ -OH acteoside 1                       | 285, 330                    | 640  | 639, 621, 179, 161                 |
| $\beta$ -OH acteoside 2                       | 285, 330                    | 640  | 639, 621, 179, 161                 |

**Table S3.** Distribution of phenolic compounds in the different extracts (tissues): A) Leaves, B) Branches C) Fruits; D); Pomace E) Shell; F) Seeds.

**A) Leaves**

| mg/kg dm                         | Frantoio     | Leccino    | Moraiolo    |
|----------------------------------|--------------|------------|-------------|
| Caffeic acid                     | nd           | 286 ± 73   | nd          |
| Luteolin-3,7-diglucoside         | nd           | 413 ± 83   | nd          |
| Rutin                            | nd           | 960 ± 166  | nd          |
| Luteolin-7- <i>O</i> -glucoside  | 4289 ± 263   | 2807 ± 113 | 2823 ± 208  |
| Apigenin derivative 1            | nd           | 997 ± 88   | nd          |
| Apigenin derivative 2            | 3014 ± 236   | 1164 ± 94  | 2779 ± 229  |
| Luteolin-4- <i>O'</i> -glucoside | 1066 ± 119   | 1782 ± 124 | nd          |
| Oleuropein                       | 36710 ± 1708 | 3600 ± 744 | 22471 ± 766 |

**B) Branch**

| mg/kg dm                                      | Frantoio     | Leccino       | Moraiolo      |
|-----------------------------------------------|--------------|---------------|---------------|
| Hydroxytyrosol                                | 3216 ± 1511  | 5647 ± 2934   | 2010 ± 2438   |
| Unknown                                       | 2142 ± 472   | 3449 ± 166    | 734 ± 171     |
| Taxifolin glucoside isomer                    | 3364 ± 713   | 12247 ± 376   | 2257 ± 653    |
| Esculetin                                     | 2286 ± 333   | 3352 ± 196    | 1021 ± 222    |
| Eriodictyol-7- <i>O</i> -glucoside isomer     | 240 ± 247    | 2466 ± 234    | 3540 ± 750    |
| Verbascoside                                  | 1786 ± 674   | 2519 ± 120    | 795 ± 46      |
| Luteolin-7- <i>O</i> -glucoside               | nd           | 647 ± 39      | 181 ± 27      |
| Taxifolin isomer                              | 4197 ± 672   | 9416 ± 423    | 5017 ± 344    |
| Oleuropein diglucoside + comselogoside isobar | 6846 ± 607   | 14699 ± 915   | 8600 ± 2435   |
| 1-acetoxypinoresinol glucoside                | 5284 ± 251   | 3820 ± 316    | 3217 ± 697    |
| Eriodictyol isomer                            | nd           | nd            | 6786 ± 930    |
| Oleuropein                                    | 82720 ± 3533 | 143794 ± 5293 | 60232 ± 16382 |
| Oleuropein isobar                             | 4739 ± 182   | 7730 ± 376    | 3274 ± 824    |

**C) Fruit**

| mg/kg dm                        | Frantoio      | Leccino      | Moraiolo      |
|---------------------------------|---------------|--------------|---------------|
| Demethyloleuropein              | 15963 ± 2947  | 41111 ± 3887 | nd            |
| Secoiridoid                     | nd            | 1855 ± 323   | nd            |
| Rutin                           | 605 ± 91      | 876 ± 118    | 970 ± 271     |
| Verbascoside                    | 4343 ± 709    | 1243 ± 150   | 1980 ± 587    |
| Luteolin-7- <i>O</i> -glucoside | 403 ± 133     | 694 ± 90     | 740 ± 228     |
| Nüzhenide                       | 4072 ± 721    | 3089 ± 322   | nd            |
| Cafselogoside                   | 1689 ± 287    | 1497 ± 262   | 479 ± 135     |
| Oleuropein                      | 55788 ± 10231 | 16969 ± 1681 | 63539 ± 18161 |
| Comselogoside                   | 1534 ± 274    | 2113 ± 316   | 7401 ± 2243   |
| Caffeoyl derivative             | 218 ± 44      | nd           | 201 ± 50      |
| Oleuropein aglycone             | 1129 ± 204    | 902 ± 152    | 744 ± 178     |
| Ligstroside                     | 2346 ± 413    | 313 ± 25     | 996 ± 262     |

**D) Pomace**

| mg/kg dm                 | Frantoio   | Leccino   | Moraiolo   |
|--------------------------|------------|-----------|------------|
| Hydroxytyrosol glucoside | 378 ± 52   | 156 ± 43  | 348 ± 6    |
| Hydroxytyrosol           | 1554 ± 31  | 1475 ± 96 | 738 ± 54   |
| Tyrosol                  | 144 ± 10   | 233 ± 36  | 71 ± 3     |
| Unknown 1                | 493 ± 14   | 450 ± 47  | 225 ± 12   |
| β-OH Acteoside 1         | 229 ± 15   | 238 ± 13  | 76 ± 6     |
| β-OH Acteoside 2         | 255 ± 19   | 254 ± 29  | 87 ± 6     |
| Unknown 2                | 214 ± 17   | 404 ± 27  | 130 ± 8    |
| Unknown 3                | 206 ± 22   | 248 ± 29  | 198 ± 10   |
| Verbascoside             | 4883 ± 329 | 865 ± 50  | 2093 ± 122 |
| Unknown 4                | 918 ± 55   | 296 ± 25  | 265 ± 53   |
| Secoiridoid              | 950 ± 89   | 1086 ± 59 | 338 ± 20   |
| Comsecologoside          | 1546 ± 108 | 978 ± 44  | 589 ± 33   |
| Luteolin                 | 690 ± 301  | 273 ± 50  | 249 ± 11   |

**E) Shell**

| mg/kg dm                                            | Frantoio   | Leccino   | Moraiolo |
|-----------------------------------------------------|------------|-----------|----------|
| Hydroxytyrosol glucoside                            | 154 ± 26   | 85 ± 6    | 46 ± 15  |
| Unknown 1                                           | 345 ± 76   | 601 ± 82  | 176 ± 16 |
| Lariciresinol-sesquilignan + Hydroxytyrosol acetate | 255 ± 47   | 297 ± 67  | 103 ± 12 |
| Unknown 2                                           | 371 ± 64   | 329 ± 68  | 161 ± 17 |
| Secoiridoid                                         | nd         | 346 ± 84  | nd       |
| Verbascoside                                        | 107 ± 18   | 65 ± 8    | 19 ± 2   |
| Nüzhenide                                           | 848 ± 396  | 358 ± 59  | 32 ± 5   |
| Unknown 3                                           | 240 ± 49   | 220 ± 45  | 120 ± 15 |
| Cinnamic derivative                                 | 668 ± 95   | 620 ± 156 | 259 ± 34 |
| Oleuropein                                          | 1261 ± 266 | 446 ± 53  | 454 ± 78 |
| Unknown 4                                           | 1099 ± 146 | 873 ± 219 | 460 ± 33 |
| Nüzhenide 11-methyl oleoside                        | 1039 ± 188 | 374 ± 44  | 124 ± 16 |
| Ligstroside                                         | 873 ± 162  | 475 ± 98  | 367 ± 24 |
| Pinoresinol                                         | 144 ± 14   | 93 ± 24   | 60 ± 5   |
| Unknown 5                                           | 159 ± 16   | 250 ± 65  | 82 ± 4   |

**F) Seeds:**

| mg/kg dm                                | Frantoio    | Leccino       | Moraiolo     |
|-----------------------------------------|-------------|---------------|--------------|
| Elenolic acid diglucoside               | nd          | nd            | nd           |
| Salidroside                             | 270 ± 32    | 501 ± 165     | 140 ± 15     |
| Oleoside derivative                     | 3968 ± 288  | 748 ± 328     | 3242 ± 171   |
| Oleoside 11-methyl ester                | 1473 ± 152  | 514 ± 181     | 1544 ± 71    |
| Oleoside 11-methyl ester isobar         | 1246 ± 29   | 313 ± 132     | 581 ± 37     |
| Nüzhenide derivative                    | 2907 ± 68   | 1511 ± 693    | 2445 ± 28    |
| Verbascoside                            | 258 ± 41    | 68 ± 25       | 237 ± 31     |
| Nüzhenide                               | 46963 ± 495 | 15305 ± 6042  | 26965 ± 849  |
| Bis(oleoside 11-methyl ester) glucoside | 5413 ± 894  | 729 ± 386     | 3725 ± 155   |
| Salidroside oleoside                    | 789 ± 138   | 705 ± 251     | 769 ± 10     |
| Nüzhenide isobaric                      | 2525 ± 133  | 1111 ± 464    | 930 ± 87     |
| Nüzhenide 11-methyl oleoside is 1       | 6447 ± 44   | 3096 ± 1279   | 3588 ± 112   |
| Nüzhenide 11-methyl oleoside            | 90909 ± 868 | 52977 ± 15895 | 81584 ± 1895 |
| Nüzhenide di (11-methyl oleoside) is 1  | 3484 ± 34   | 2193 ± 1067   | 2962 ± 225   |
| Nüzhenide 11-methyl oleoside is 2       | 6595 ± 92   | 2381 ± 1062   | 2732 ± 224   |
| Nüzhenide 11-methyl oleoside is 3       | 6128 ± 127  | 3830 ± 1687   | 4441 ± 258   |
| Nüzhenide di (11-methyl oleoside) is 2  | 1275 ± 21   | 833 ± 397     | 404 ± 12     |
| Ligstroside oleoside                    | 347 ± 71    | 196 ± 64      | 60 ± 7       |
| Tyrosol derivative 1                    | 115 ± 13    | nd            | 70 ± 7       |
| Tyrosol derivative 2                    | 74 ± 10     | nd            | 145 ± 9      |
| Tyrosol derivative 3                    | 153 ± 9     | nd            | 27 ± 6       |
| Tyrosol derivative 4                    | 304 ± 17    | 110 ± 40      | 177 ± 5      |
| Tyrosol derivative 5                    | 188 ± 10    | 123 ± 43      | 122 ± 8      |
| Tyrosol derivative 6                    | 160 ± 9     | 37 ± 16       | 96 ± 6       |

**Table S4.** Phenolic content in EVOOs

| Phenolic compounds (mg/kg)                                       | Frantoio     | Leccino     | Moraiolo    |
|------------------------------------------------------------------|--------------|-------------|-------------|
| Hydroxytyrosol                                                   | 2.5 ± 0.2    | 2.1 ± 0.2   | 1.4 ± 0.1   |
| Tyrosol                                                          | 4.8 ± 0.2    | 2.6 ± 0.1   | 1.9 ± 0.1   |
| Vanillic + caffeic acids                                         | 1.3 ± 0.0    | 1.2 ± 0.0   | 1.1 ± 0.0   |
| Vanillin                                                         | 2.9 ± 0.2    | 4.9 ± 0.3   | 2.2 ± 0.1   |
| <i>p</i> -coumaric acid                                          | 1.1 ± 0.1    | 0.6 ± 0.1   | 0.7 ± 0.1   |
| Hydroxytyrosol acetate                                           | 1.1 ± 0.1    | 2.9 ± 0.3   | 1.3 ± 0.1   |
| Ferulic acid                                                     | 4.3 ± 0.8    | 0.4 ± 0.1   | 0.6 ± 0.1   |
| <i>o</i> -coumaric acid                                          | 1.2 ± 0.2    | 0.8 ± 0.2   | 0.6 ± 0.1   |
| Dialdehydic form of decarboxymethyloleuropein aglycone oxidized  | 18.6 ± 1.6   | 19.6 ± 1.6  | 12.0 ± 1.0  |
| Dialdehydic form of decarboxymethyloleuropein aglycone           | 103.5 ± 1.1  | 177.1 ± 1.9 | 77.4 ± 0.8  |
| Oleuropein                                                       | 36.9 ± 1.3   | 19.1 ± 0.7  | 26.9 ± 1.0  |
| Dialdehydic form of oleuropein aglycone                          | 16.3 ± 1.0   | 9.9 ± 0.6   | 12.3 ± 0.8  |
| Dialdehydic form of decarboxymethylligstroside aglycone oxidized | 91.8 ± 4.5   | 33.4 ± 1.6  | 49.5 ± 2.4  |
| Dialdehydic form of decarboxymethylligstroside aglycone          | 77.6 ± 1.7   | 115.0 ± 2.5 | 39.6 ± 0.9  |
| Pinoresinol + 1-acetoxy-pinoresinol                              | 40.2 ± 1.0   | 18.8 ± 0.5  | 23.2 ± 0.6  |
| Cinnamic acid                                                    | 3.3 ± 0.5    | 2.2 ± 0.3   | 1.2 ± 0.2   |
| Dialdehydic form of ligstroside aglycone                         | 3.7 ± 0.4    | 3.5 ± 0.4   | 3.6 ± 0.4   |
| Aldehydic and hydroxylic form of oleuropein aglycone oxidized    | 28.1 ± 1.3   | 16.7 ± 0.7  | 30.8 ± 1.4  |
| Luteolin                                                         | 6.4 ± 0.9    | 1.2 ± 0.2   | 1.6 ± 0.2   |
| Aldehydic and hydroxylic form of oleuropein aglycone             | 73.9 ± 1.1   | 44.3 ± 0.6  | 86.6 ± 1.2  |
| Aldehydic and hydroxylic form of ligstroside aglycone oxidized   | 23.9 ± 2.4   | 13.1 ± 1.3  | 13.6 ± 1.4  |
| Apigenin                                                         | 4.1 ± 0.4    | 3.6 ± 0.4   | 2.1 ± 0.2   |
| Methyl luteolin                                                  | 16.0 ± 1.3   | 9.6 ± 0.8   | 18.5 ± 1.5  |
| Aldehydic and hydroxylic form of ligstroside aglycone            | 6.6 ± 0.2    | 2.1 ± 0.1   | 4.3 ± 0.2   |
| Total phenolic compounds                                         | 569.9 ± 10.0 | 504.8 ± 8.9 | 413.0 ± 7.3 |



**Table S5.** Data concerning the calibration curves for the 5 external standards used for the quantitation of phenols and triterpenoids.

| Number | Standards      | Wavelengths (nm) | Different solutions (μM)  | Linear equitation      | R <sup>2</sup> |
|--------|----------------|------------------|---------------------------|------------------------|----------------|
| 1      | hydroxytyrosol | 280              | 800, 400, 160, 100, 50, 5 | $Y = 0.783 X + 6.684$  | 0.965          |
| 2      | oleuropein     | 280              | 400, 200, 50              | $Y = 0.845 X + 12.183$ | 0.956          |
| 3      | maslinic acid  | 210              | 100, 10, 1                | $Y = 0.784 X + 21.535$ | 0.999          |
| 4      | oleanolic acid | 210              | 20, 10, 1                 | $Y = 0.530 X + 3.979$  | 0.837          |
| 5      | nüzhenide      | 240              | 800, 400, 200, 50         | $Y = 0.0144X + 12.817$ | 0.900          |

Note: *Y* indicates the HPLC peak at 280, 210 and 240 nm, and *X* indicates the molar concentrations for these standards.

**Figure S1.** The graphic scheme of this work

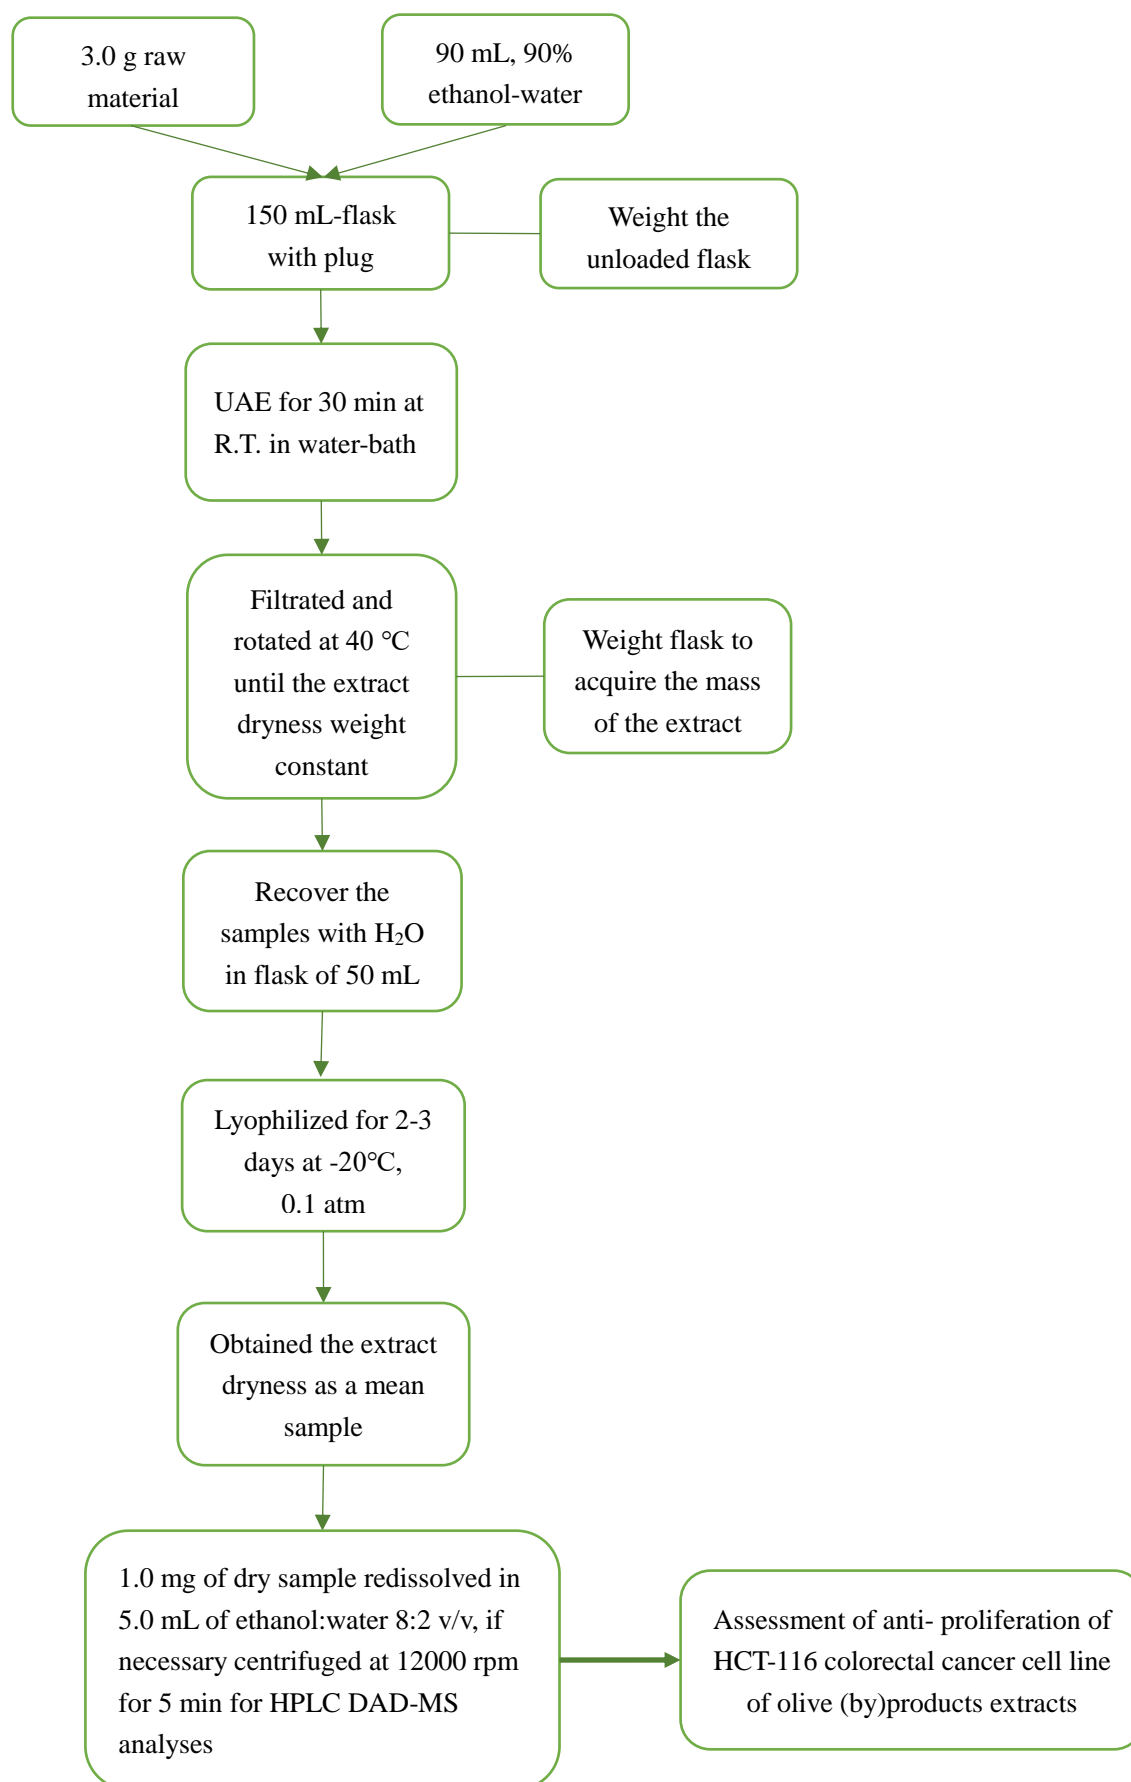

**Figure S2.** HPLC profile of triterpenoids for mixture standards: A, maslinic acid; B, oleanolic acid; C, ursolic acid; D, erythrodiol

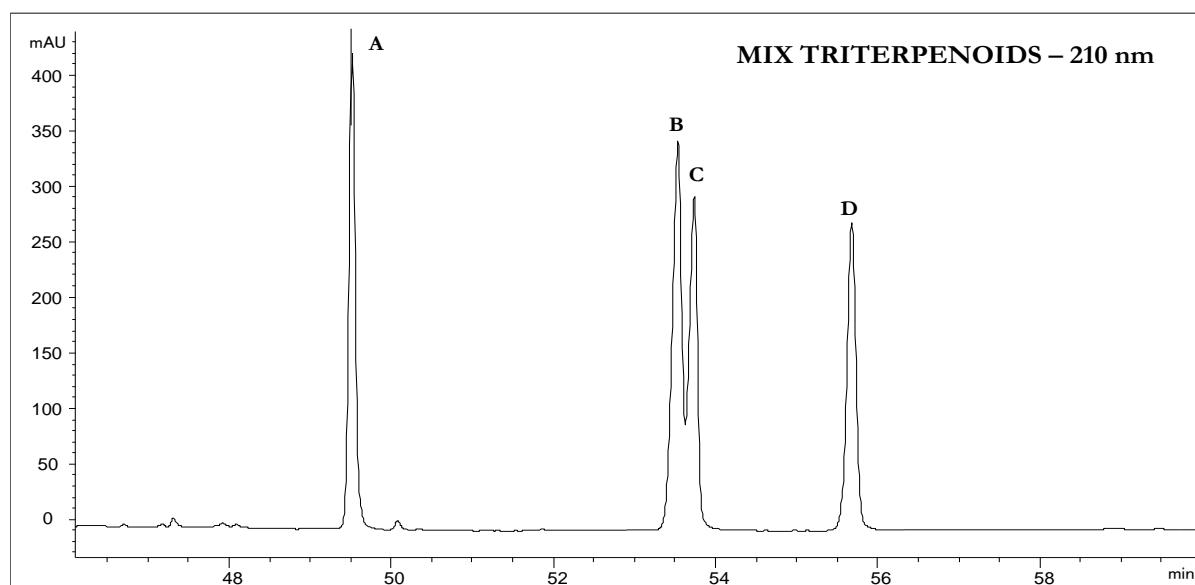

Supplement: s1 [file s1]
